# Supplementary material for: Facile aqueous synthesis and comparative evaluation of TiO2-semiconductor and TiO2-metal nanohybrid photocatalysts in antibiotics degradation under visible light
Source: Royal Society of Chemistry journal article supplement (doi:10.1039/d3ra06231g), 2023-01-01
Supplement: d3ra06231g1.pdf [file d3ra06231g1.pdf]

## Supporting Information

### **Facile Aqueous Synthesis and Comparative Evaluation of TiO<sub>2</sub>- Semiconductor and TiO<sub>2</sub>-Metal Nanohybrid Photocatalysts in Antibiotics Degradation Under Visible Light.**

Yuping Zhang<sup>1,§</sup>, Shijie Ju<sup>1,§</sup>, Yuping Zhang<sup>1,§</sup>, Gregori Casals<sup>2,3</sup>, Jie Tang<sup>1</sup>, Yichao Lin<sup>1</sup>, Xiaofang Li<sup>1</sup>, Lihua Liang<sup>1</sup>, Zhiyu Jia<sup>4,\*</sup>, Muling Zeng<sup>1,\*</sup>, Eudald Casals<sup>1,\*</sup>

<sup>1</sup>School of Biotechnology and Health Sciences, Wuyi University, Jiangmen 529020, PR China

<sup>2</sup>Biochemistry and Molecular Genetics Department, Clinical and Provincial Hospital of Barcelona, Barcelona 08036, Spain.

<sup>3</sup>IDIBAPS Research Center, Barcelona 08036, Spain.

<sup>4</sup>Key Laboratory of Cluster Science, Ministry of Education of China, Beijing Key Laboratory of Photoelectronic/Electrophotonic Conversion Materials, School of Chemistry and Chemical Engineering, Beijing Institute of Technology, Beijing 100081, PR China

<sup>§</sup>Both authors contributed equally to this study.

Corresponding authors email:

Zhiyu Jia: [jzy@bit.edu.cn](mailto:jzy@bit.edu.cn)

Muling Zeng: [mulingzeng@163.com](mailto:mulingzeng@163.com)

Eudald Casals: [wychemecm@126.com](mailto:wychemecm@126.com)

**Figure S1. Characterization of the single-component nanoparticles**

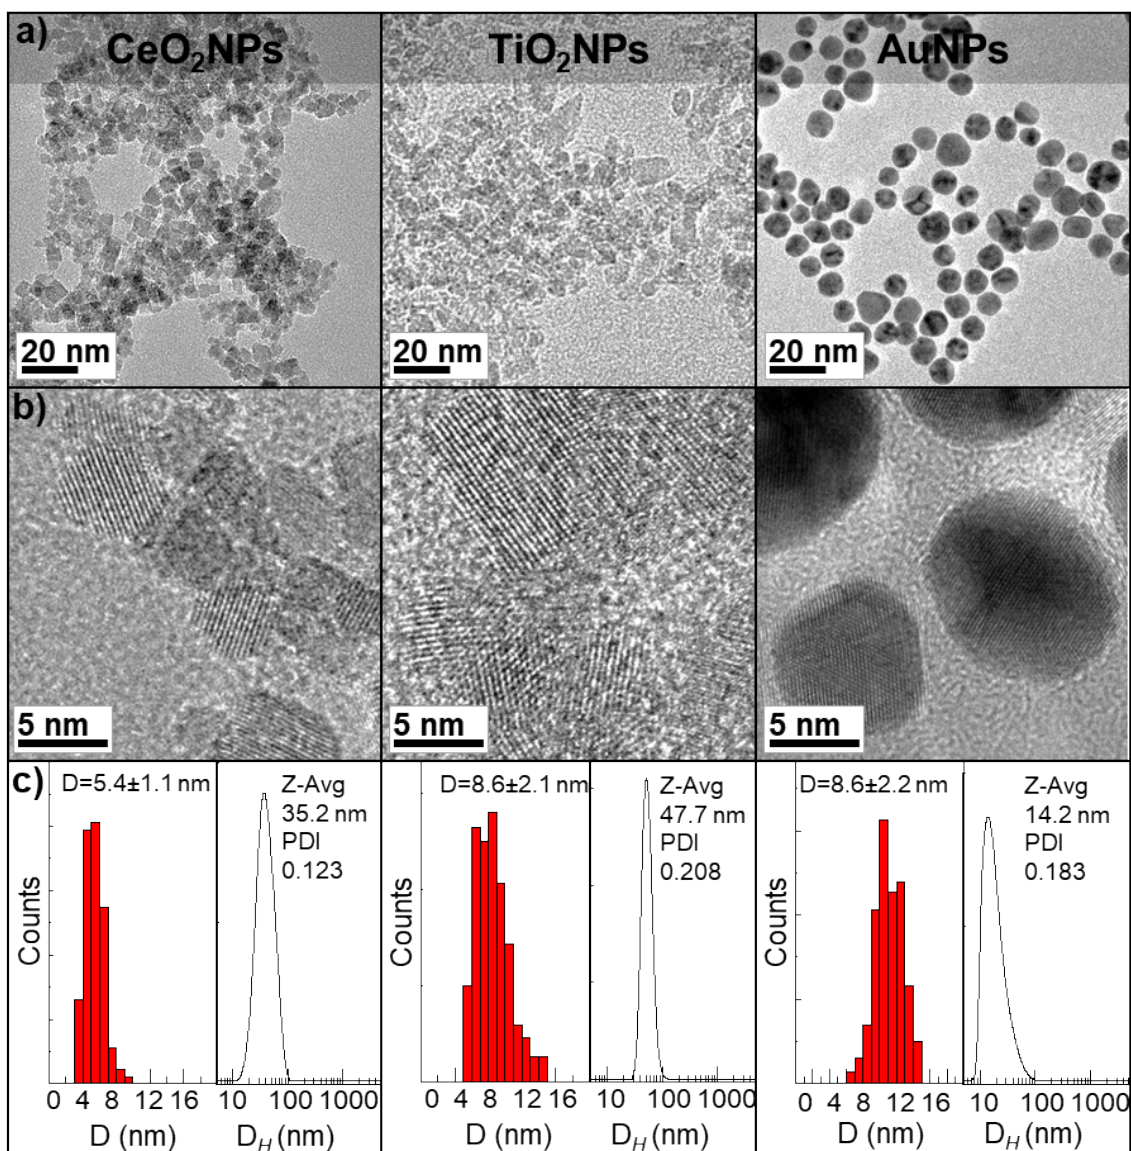

**Figure 1. Characterization of the single component NPs used in this work. a) TEM images at low magnification; b) HR-TEM images; c) TEM image analysis using image J software (left panels) and hydrodynamic diameters measured by DLS (intensity distribution).**

**Figure S2. XRD characterization of the Au/TiO<sub>2</sub> hybrid nanostructures.**

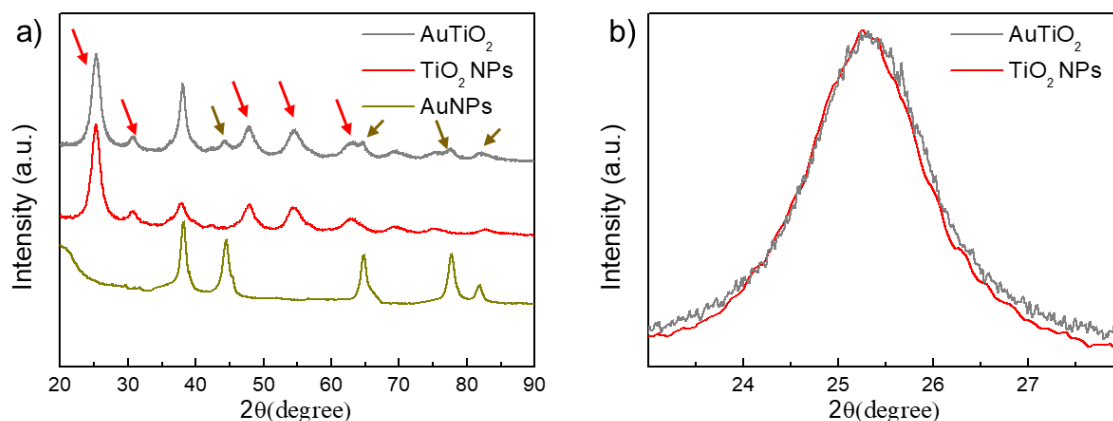

**Figure S2. XRD characterization of the CeO<sub>2</sub>/TiO<sub>2</sub> hybrid nanostructures. a)** Two series of sets of diffraction peaks are present in the Au/TiO<sub>2</sub> hybrid, indicated with arrows with the same colour as the single component NPs. The peaks are assigned to the fluorite(cubic) TiO<sub>2</sub> phase (JCPDS No 21-1272; red line) and to the cubic Au phase (JCPDS No 04-0784; orange line). The diffraction peaks of the AuNPs are sharp and intense, while those of TiO<sub>2</sub>NPs are broad and weak, which is in agreement with the small crystalline size of the TiO<sub>2</sub>NPs. **b)** Detail of the (101) reflection of the TiO<sub>2</sub>NPs and in the Au/TiO<sub>2</sub> hybrids which shows the similar crystalline size in both cases (Table S1).

**Figure S3. Effect of photocatalyst loading.**

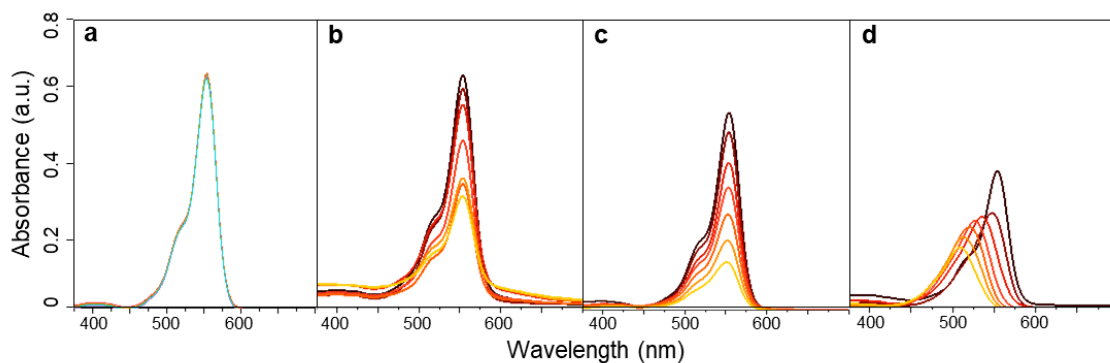

**Figure S4.** Effect of photocatalyst loading for the degradation of RhB. Initial RhB concentration is 2.5mM. Varying concentrations of TiO<sub>2</sub>NPs are 0.005 (a) 0.05 (b) 0.5, (c), and 5 mg/mL (d).

**Figure S4. Molecular structures of CIP and SMX.**

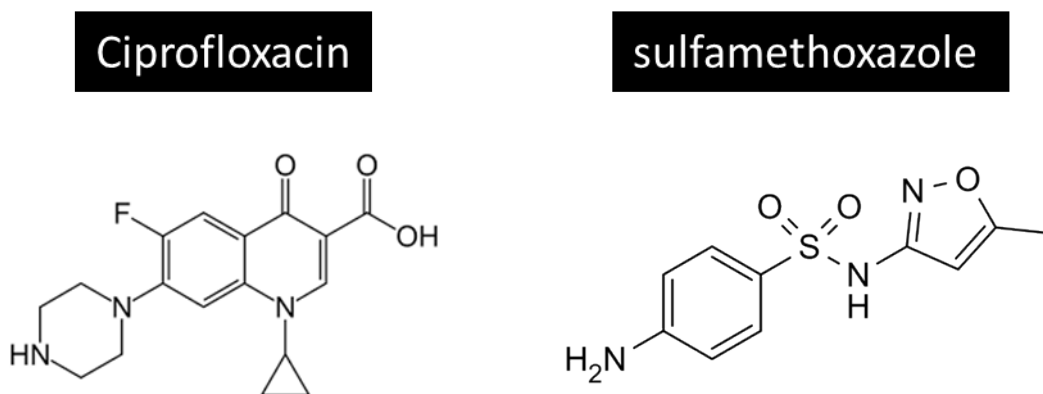

**Table S1. Physicochemical characteristics of all nanomaterials employed in this work.**

|                                        | <b>Scherrer size<br/>(nm)</b> | <b>TEM size<br/>(nm)</b> | <b>DLS size<br/>(nm)</b> | <b>E<sub>g</sub><br/>(eV)</b> |
|----------------------------------------|-------------------------------|--------------------------|--------------------------|-------------------------------|
| <b>Au</b>                              | 7.32                          | 8.6                      | 14.2                     |                               |
| <b>CeO<sub>2</sub></b>                 | 4.81                          | 5.4                      | 35                       | 3.55                          |
| <b>TiO<sub>2</sub></b>                 | 6.08                          | 8.6                      | 47                       | 3.52                          |
| <b>Au/TiO<sub>2</sub></b>              | 6.17                          |                          | 152                      | 3.34                          |
| <b>CeO<sub>2</sub>/TiO<sub>2</sub></b> | 5.12                          |                          | 168                      | 3.01                          |
